# Supplementary material for: Fe-Induced electronic optimization of mesoporous Co–Ni oxide nanosheets as an efficient binder-free electrode for the oxygen evolution reaction
Source: Royal Society of Chemistry journal article supplement (doi:10.1039/d1nj00092f), 2021-01-01
Supplement: d1nj00092f1.pdf [file d1nj00092f1.pdf]

**Journal: New Journal of Chemistry**

## **Electronic Supplementary Information**

### **Fe-induced electronic optimization of mesoporous Co-Ni oxide nanosheets as an efficient binder-free electrode for oxygen evolution reaction**

Jingjing Ju<sup>a,b</sup>, Jiajia Lu<sup>a</sup>, Xiaoyue Shi<sup>a,b</sup>, Hongwei Zhu<sup>a</sup>, Han-Pu Liang<sup>a,b\*</sup>

<sup>a</sup> *Key laboratory of Biofuels, Qingdao Institute of Bioenergy and Bioprocess Technology,  
Chinese Academy of Sciences, No.189 Songling Road, Qingdao 266101, P. R. China*

<sup>b</sup> *Center of Materials Science and Optoelectronics Engineering, University of Chinese  
Academy of Sciences, No. 19 (A) Yuquan Road, Beijing 100049, P. R. China*

*\*Corresponding Author. E-mail: [lianghp@qibebt.ac.cn](mailto:lianghp@qibebt.ac.cn)*

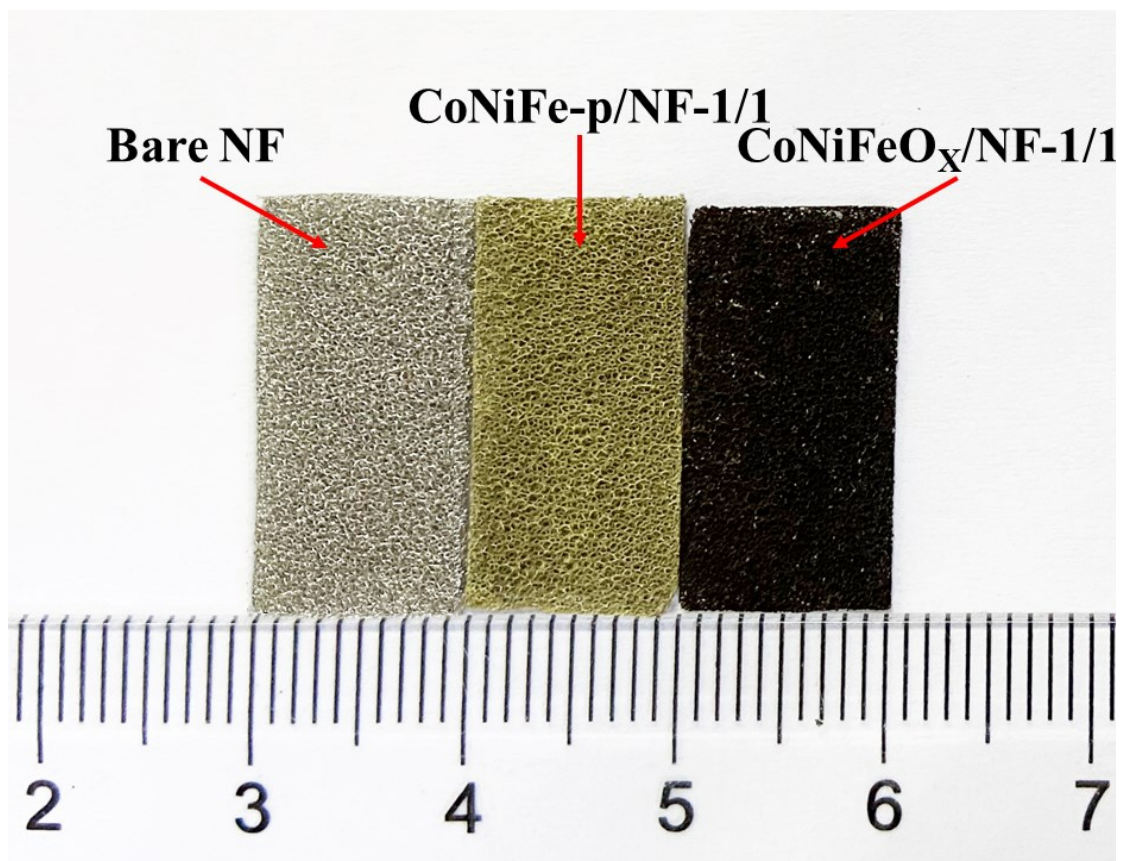

**Figure S1.** Optical image of bare NF (L), CoNiFe precursor/NF-1/1 (M) and CoNiFeO<sub>x</sub>/NF-1/1 (R).

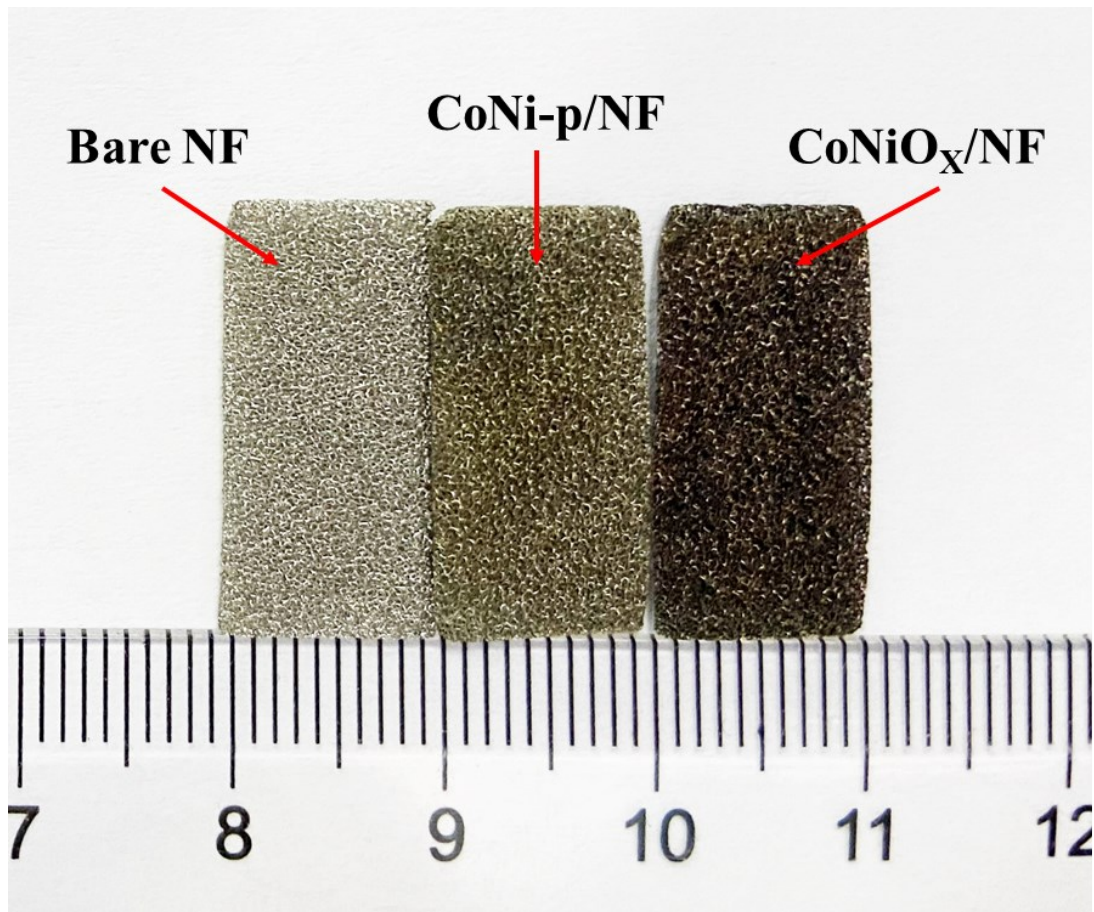

**Figure S2.** Optical image of bare NF (L), CoNi-p/NF (M) and CoNiO<sub>x</sub>/NF (R).

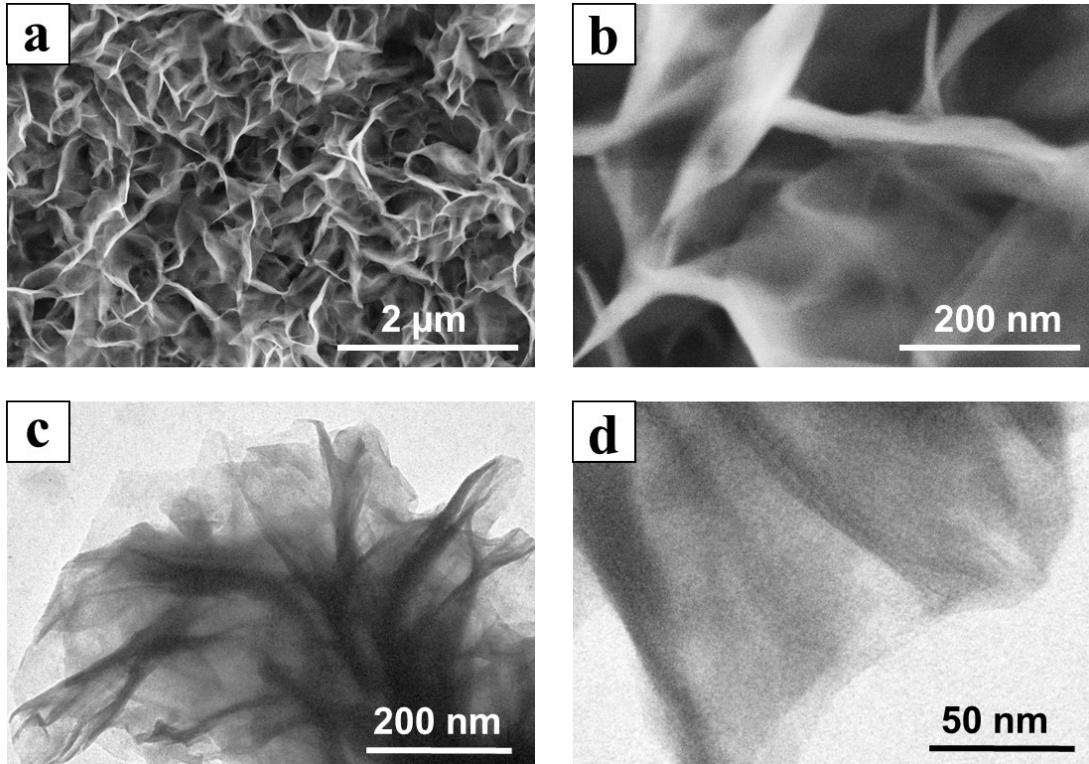

**Figure S3.** (a-b) SEM and (c-d) TEM images of CoNiFe-p/NF-1/1 nanosheets (scraped from Ni foam) at different magnifications.

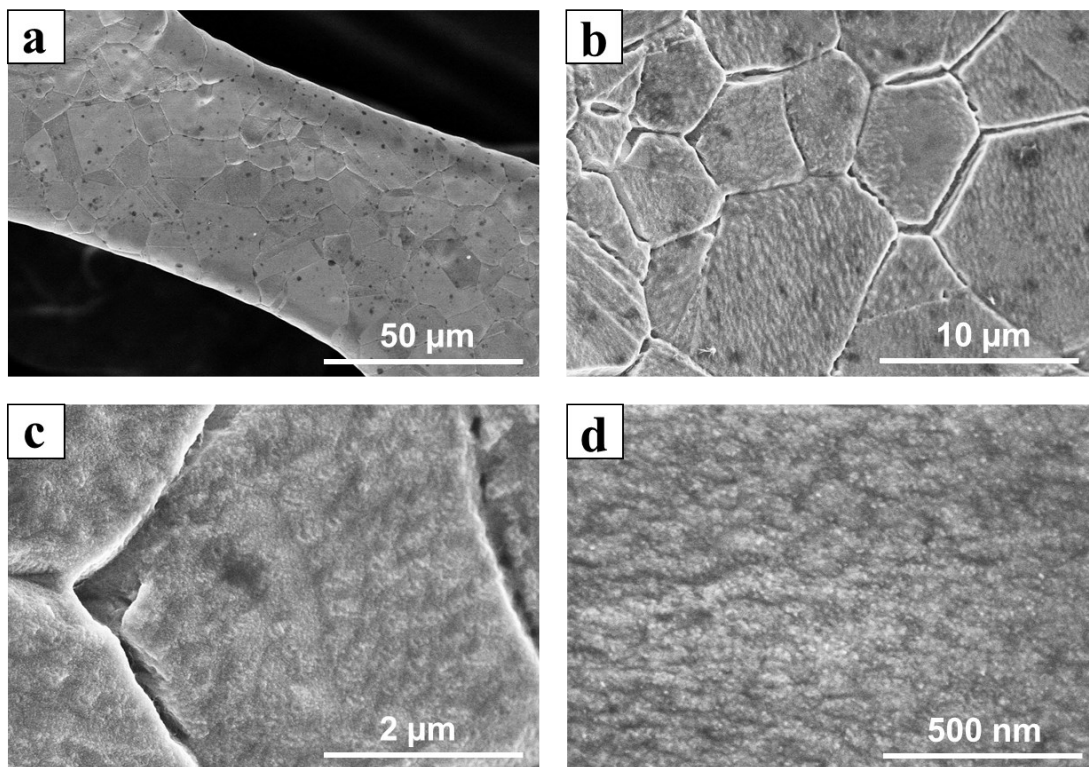

**Figure S4.** SEM images of CoNiO<sub>x</sub>/NF at different magnifications.

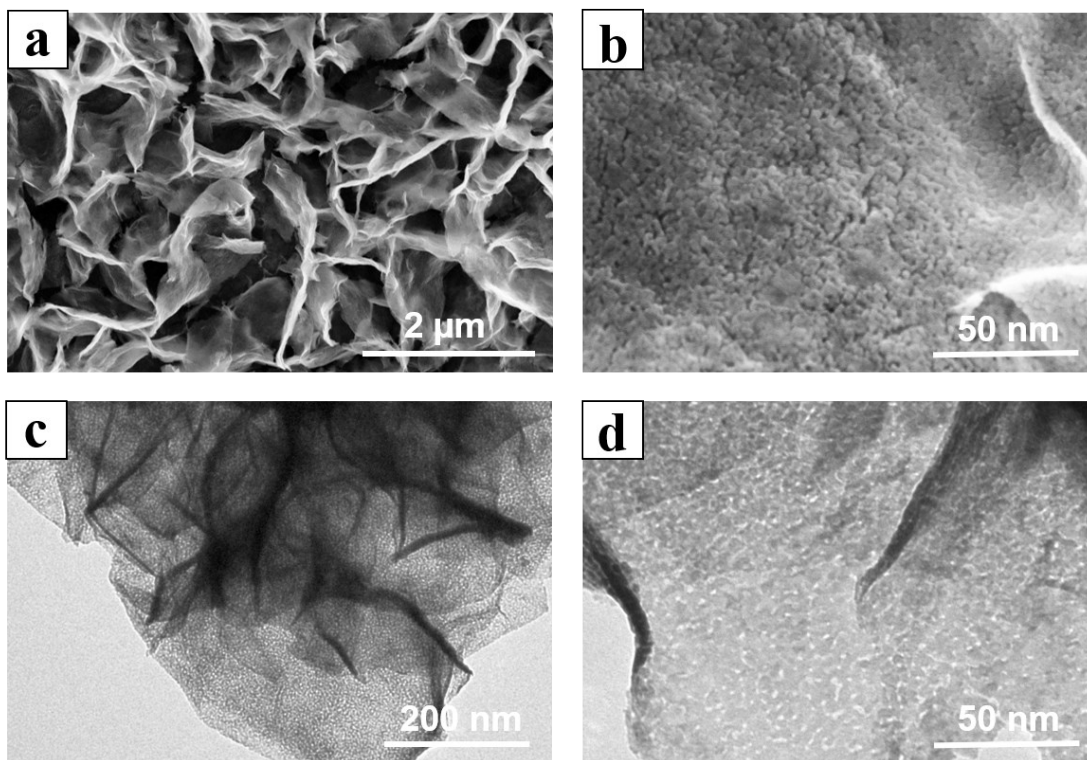

**Figure S5.** (a-b) SEM and (c-d) TEM images of CoNiFeO<sub>x</sub>/NF-2/1 nanosheets (scraped from Ni foam) at different magnifications.



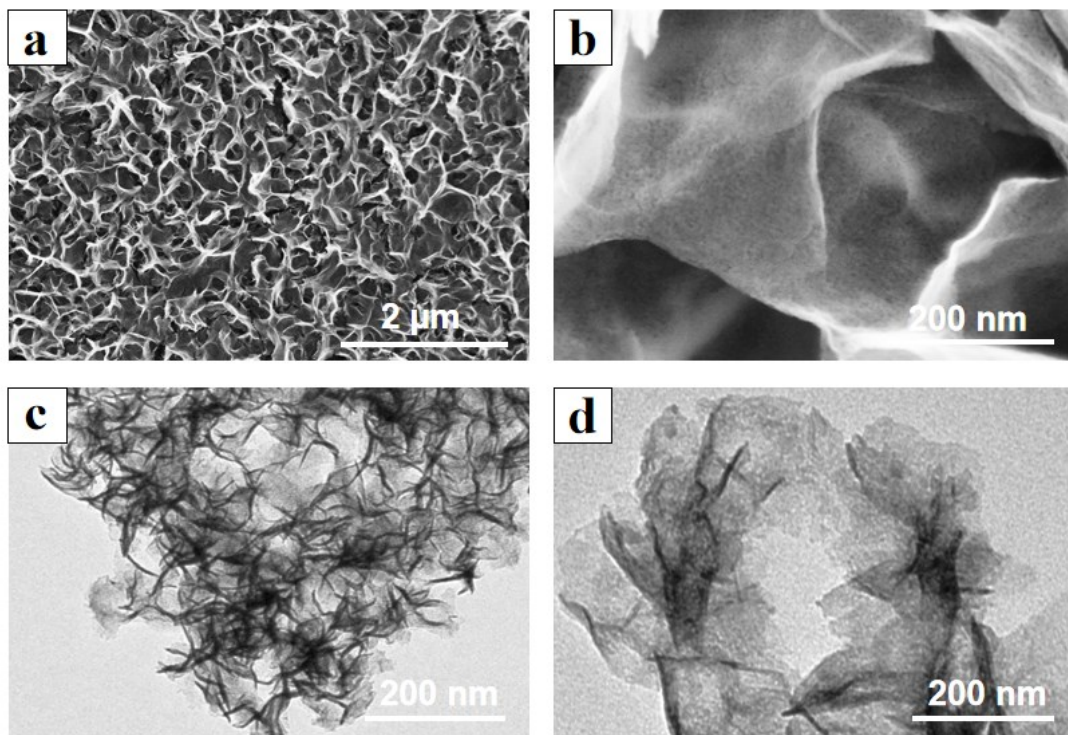

**Figure S6.** (a-b) SEM and (c-d) TEM images of CoNiFeO<sub>x</sub>/NF-1/2 nanosheets (scraped from Ni foam) at different magnifications.

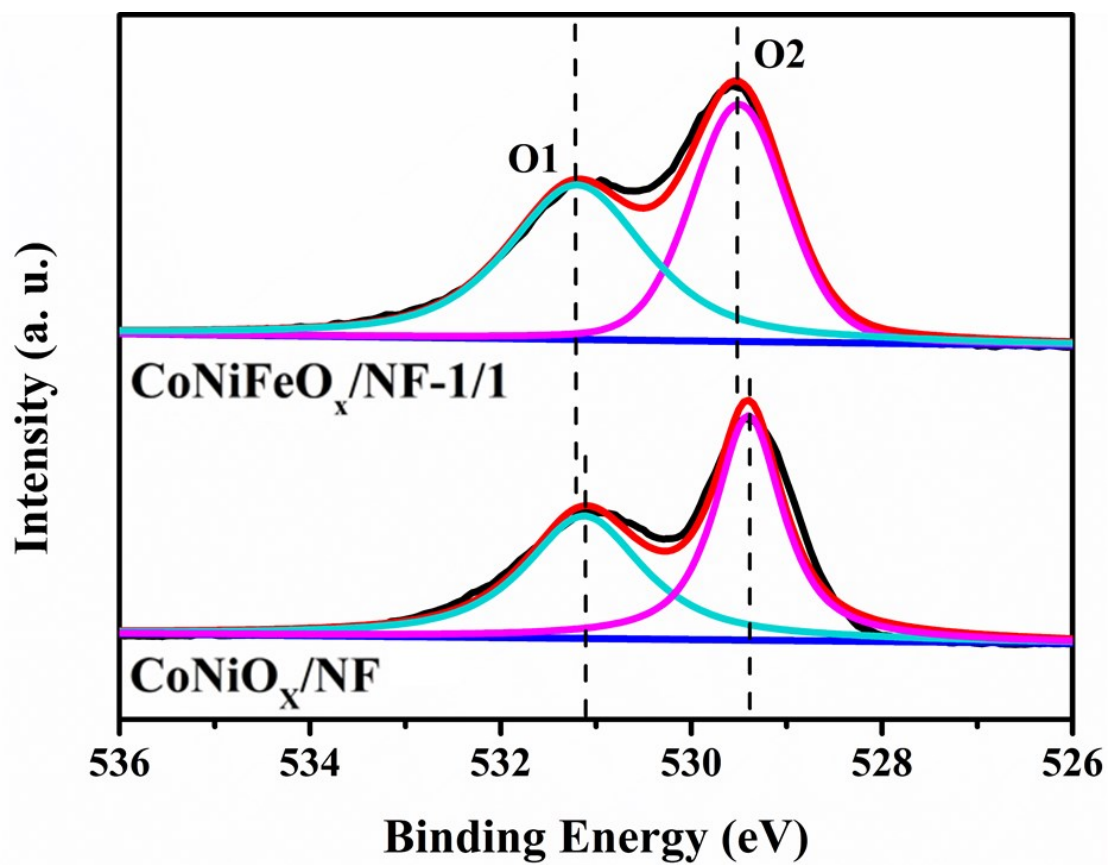

Figure S7. O 1s XPS spectras of CoNiFeO<sub>x</sub>/NF-1/1 and CoNiO<sub>x</sub>/NF.



**Table S1** XPS survey scans for atomic ratio of metal (Ni, Co and Fe)

| Catalysts                    | Ni (atomic %) | Co (atomic %) | Fe (atomic %) |
|------------------------------|---------------|---------------|---------------|
| CoNiFeO <sub>x</sub> /NF-1/1 | 14.5          | 8.1           | 12.8          |
| CoNiO <sub>x</sub> /NF       | 20.5          | 5.6           | -             |

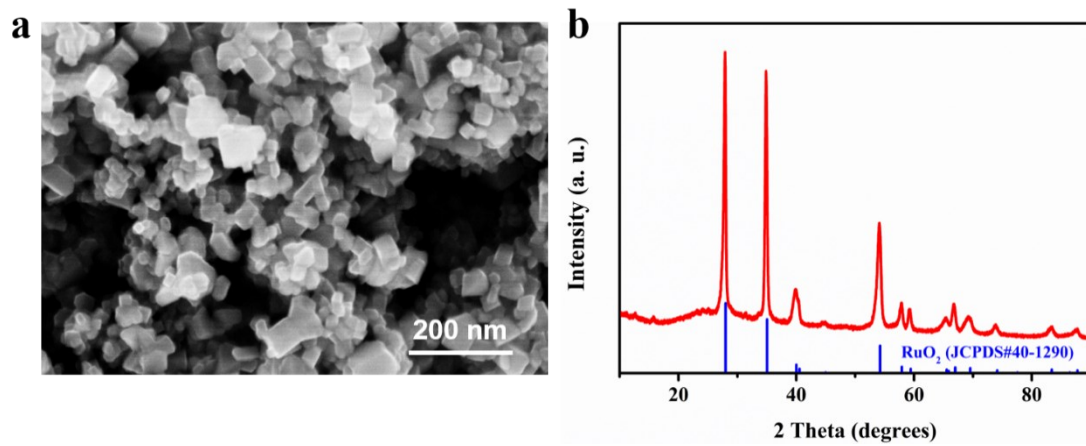

**Figure S8.** (a) SEM image and (b) XRD pattern of commercial RuO<sub>2</sub>.

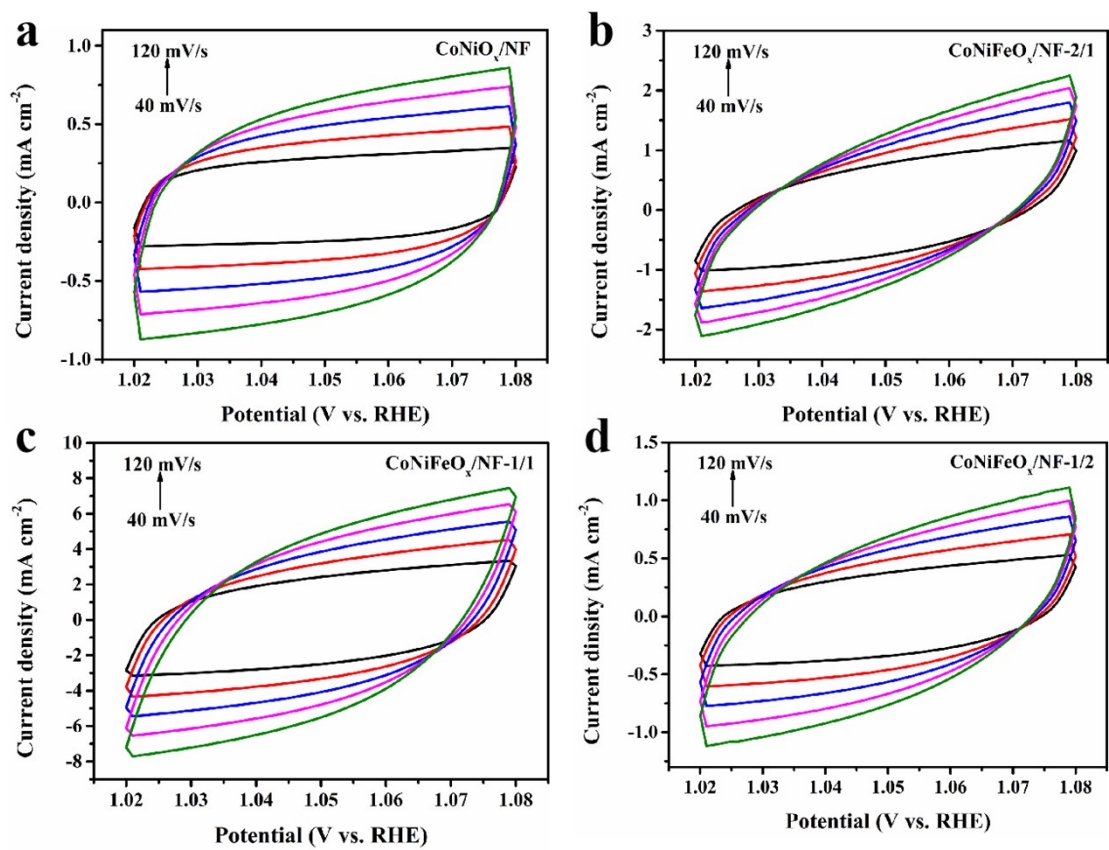

**Figure S9** The cyclic voltammograms of (a) CoNiFeO<sub>x</sub>/NF-1/1, (b) CoNiFeO<sub>x</sub>/NF-2/1, (c) CoNiFeO<sub>x</sub>/NF-1/2, and (d) CoNiO<sub>x</sub>/NF from 40 to 120 mV/s at 1.05 V vs. RHE.

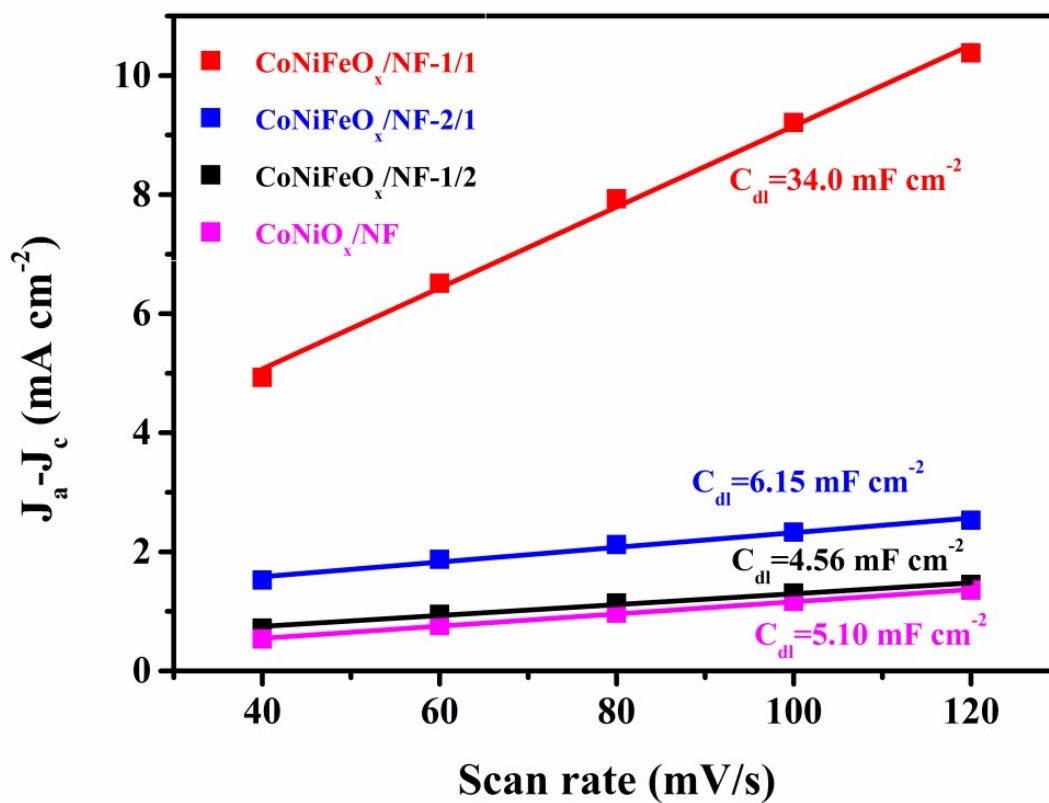

**Figure S10** Capacitive current as a function of the scan rate for CoNiFeO<sub>x</sub>/NF-1/1, CoNiFeO<sub>x</sub>/NF-2/1, CoNiFeO<sub>x</sub>/NF-1/2, and CoNiO<sub>x</sub>/NF.

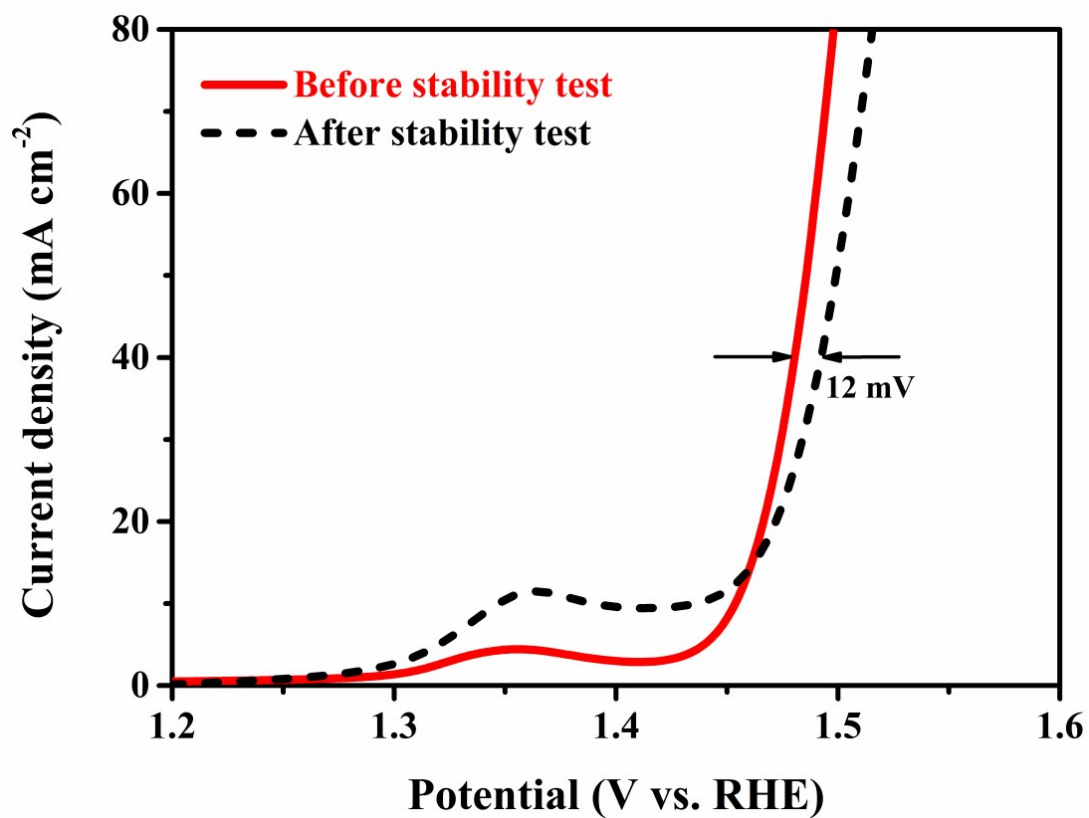

**Figure S11.** LSV curves of CoNiFeO<sub>x</sub>/NF-1/1 before and after electrochemical durability testing for 250 h.

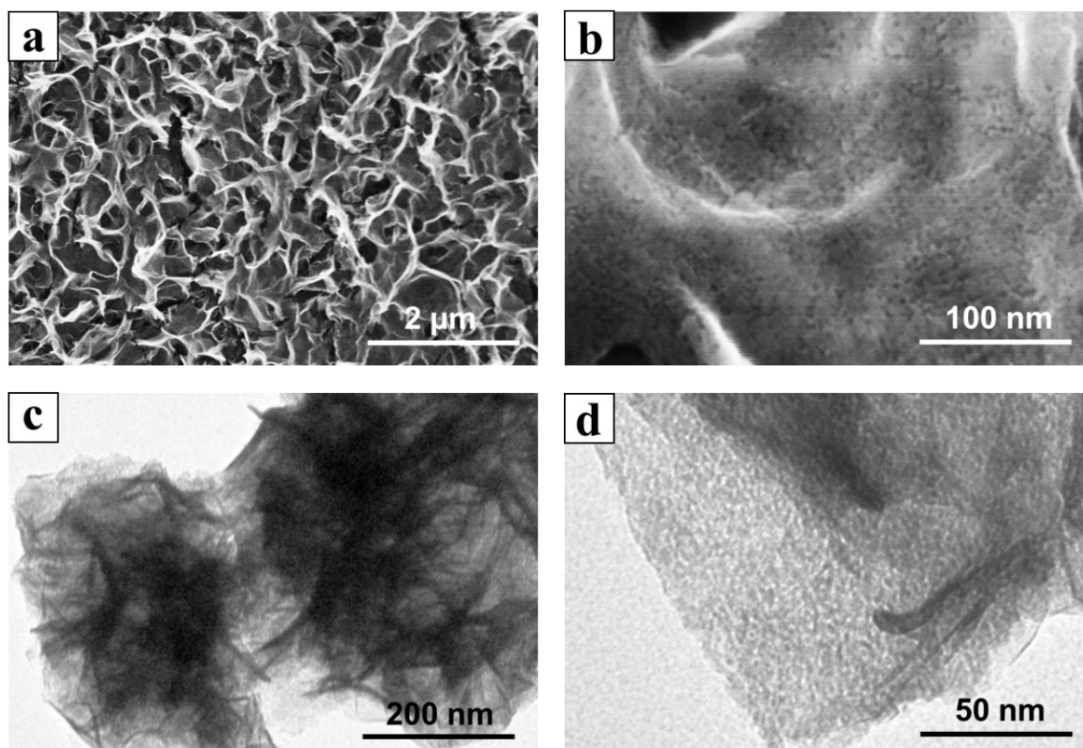

**Figure S12.** (a-b) SEM and (c-d) TEM images of CoNiFeO<sub>x</sub>/NF-1/1 after electrochemical durability testing for 250 h.



**Table S2** Comparisons of the electrocatalytic activities of recently reported OER catalysts

| Catalysts                                               | Overpotential(mV)<br>@ a specific current<br>density | Tafel<br>slope<br>(mV<br>dec <sup>-1</sup> ) | Stability                          | Refs                 |
|---------------------------------------------------------|------------------------------------------------------|----------------------------------------------|------------------------------------|----------------------|
| <b>CoNiFeO<sub>x</sub>/NF-1/1</b>                       | <b>221@10 mA cm<sup>-2</sup></b>                     | <b>43.8</b>                                  | <b>250 h@20 mA cm<sup>-2</sup></b> | <b>This<br/>work</b> |
| NiFe LDH                                                | 239@10 mA cm <sup>-2</sup>                           | 66.3                                         | 24 h@10 mA cm <sup>-2</sup>        | [2]                  |
| A-NiFe-LDH                                              | 241@10 mA cm <sup>-2</sup>                           | 55                                           | 10 h@10 mA cm <sup>-2</sup>        | [7]                  |
| Ni-Co-Fe oxide                                          | 279@10 mA cm <sup>-2</sup>                           | 61                                           | 24 h@1.53 V                        | [16]                 |
| CoFe hydroxide                                          | 260@10 mA cm <sup>-2</sup>                           | 48.7                                         | 25 h@10 mA cm <sup>-2</sup>        | [17]                 |
| Co-Fe-O                                                 | 260@10 mA cm <sup>-2</sup>                           | 53                                           | 60000 s@1.49 V                     | [19]                 |
| CoFe-H                                                  | 280@10 mA cm <sup>-2</sup>                           | 28                                           | 40 h@10 mA cm <sup>-2</sup>        | [21]                 |
| Fe <sub>2</sub> -NiCoP                                  | 293@50 mA cm <sup>-2</sup>                           | 37.8                                         | 22 h@10 mA cm <sup>-2</sup>        | [23]                 |
| Co <sub>0.5</sub> Fe <sub>0.5</sub> OOH-NSUPs           | 220@20 mA cm <sup>-2</sup>                           | 38.2                                         | 200 h@40 mA cm <sup>-2</sup>       | [24]                 |
| FeCoOOH/CC                                              | 259@10 mA cm <sup>-2</sup>                           | 34.9                                         | 100 h@20 mA cm <sup>-2</sup>       | [25]                 |
| NiFe <sub>x</sub> /NiFe <sub>2</sub> O <sub>4</sub> @NC | 262@10 mA cm <sup>-2</sup>                           | 51.4                                         | 150 h@10 mA cm <sup>-2</sup>       | [26]                 |
| CoFe <sub>2</sub> O <sub>4</sub> /NF                    | 266@10 mA cm <sup>-2</sup>                           | 53                                           | 24 h@10 mA cm <sup>-2</sup>        | [27]                 |
| Co <sub>0.75</sub> Fe <sub>0.25</sub> P                 | 270@10 mA cm <sup>-2</sup>                           | 48.2                                         | 18 h@1.5 V                         | [29]                 |
| CoFe <sub>2</sub> O <sub>4</sub>                        | 342@10 mA cm <sup>-2</sup>                           | 57.1                                         | 15 h@1.57 V                        | [30]                 |
| CoOOH                                                   | 245@10 mA cm <sup>-2</sup>                           | 53.9                                         | 250 h@10 mA cm <sup>-2</sup>       | [31]                 |
| Fe@Ni(OH) <sub>2</sub> /NF                              | 250@10 mA cm <sup>-2</sup>                           | 46                                           | 500 h@10 mA cm <sup>-2</sup>       | [35]                 |
| CoFe-LDH/NCO/NF                                         | 273@20 mA cm <sup>-2</sup>                           | 108                                          | 32 h@20 mA cm <sup>-2</sup>        | [36]                 |
| Fe-doped NiCoO <sub>2</sub>                             | 302@10 mA cm <sup>-2</sup>                           | 42                                           | 10 h@1.53 V                        | [37]                 |
| NiFeCo-LDH/CF                                           | 249@10 mA cm <sup>-2</sup>                           | 42                                           | 20 h@1.48 V                        | [41]                 |
| 2.5Fe-NiCoP/PBA HNCs                                    | 290@10 mA cm <sup>-2</sup>                           | 70                                           | 40 h@10 mA cm <sup>-2</sup>        | [42]                 |
| Fe <sub>0.4</sub> Ni <sub>0.6</sub> -alloy              | 261@50 mA cm <sup>-2</sup>                           | 67                                           | 80 h@250 mA cm <sup>-2</sup>       | [43]                 |
| Ni <sub>0.8</sub> Fe <sub>0.2</sub> /Co-H NAs/NF        | 231@10 mA cm <sup>-2</sup>                           | 32.9                                         | 135 h@10 mA cm <sup>-2</sup>       | [44]                 |
| CoNiFeO <sub>x</sub> -NC                                | 265@50 mA cm <sup>-2</sup>                           | 64.1                                         | 40 h@1.49 V                        | [45]                 |
